# Supplementary material
Source: PubMed Central journal article supplement (PMC4631037)
Supplement: chest_148_5_1204_ds01.pdf [file chest_148_5_1204_ds01.pdf]

## Prognosis for Spontaneous Resolution of OSA in Children

*Ronald D. Chervin, MD; Susan S. Ellenberg, PhD; Xiaoling Hou, MS; Carole L. Marcus, MBBCh; Susan L. Garetz, MD; Eliot S. Katz, MD; Elise K. Hodges, PhD; Ron B. Mitchell, MD; Dwight T. Jones, MD; Raanan Arens, MD; Raouf Amin, MD; Susan Redline, MD; and Carol L. Rosen, MD, FCCP; for the Childhood Adenotonsillectomy Trial*

CHEST 2015; 148(5):1204–1213

### **e-Appendix 1.**

#### METHODS – ADDITIONAL DETAIL

##### Participants

The CHAT design has been published previously.<sup>1,2</sup> Institutional review board approvals were obtained at each site (Table 1), as was informed consent from caregivers, and assent from children aged  $\geq 7$  years. Children aged 5-9 years who generated data for the current analyses were recruited from pediatric sleep clinics and otolaryngology practices at 6 U.S. medical centers. Inclusion criteria included an obstructive apnea/hypopnea index (AHI)  $\geq 2$  events per hour of sleep, or an obstructive apnea index (OAI)  $\geq 1$ , and candidacy for adenotonsillectomy for clinical purposes according to the subject's otolaryngologist. Exclusion criteria included AHI  $> 30$ , OAI  $> 20$ , oxygen saturation  $< 90\%$  for  $\geq 2\%$  of total sleep time, recurrent tonsillitis, a body mass index (BMI) z-score  $\geq 3$ , or medication for Attention-Deficit/Hyperactivity Disorder (ADHD). Among 453 children randomized in CHAT,  $n=194$  had complete follow-up, remained untreated surgically, and provided data for the current analyses.

##### Outcomes

Objective resolution of OSAS was defined as an AHI  $< 2$  and an OAI  $< 1$  on polysomnography at 7-month follow-up. Polysomnography followed standard guidelines, as did centralized scoring using pediatric criteria.<sup>1-3</sup> The AHI included obstructive apneas and all hypopneas, but not respiratory effort-related arousals. Resolution of OSAS symptoms was defined by scores on the caregiver-completed Pediatric Sleep Questionnaire Sleep-Related Breathing Disorder (PSQ-SRBD) scale. This well-validated<sup>4,5</sup> symptom inventory includes 22 items with "yes", "no", and "don't know" response formats: the total score (ranging from 0 to 1) is the number of positive responses divided by the number of items answered "yes" or "no". Items focus on snoring; other symptoms of obstructed breathing; observed apneas; ancillary symptoms such as mouth breathing; sleepiness; and behavioral symptoms. Component scores include a

*Online supplements are not copyedited prior to posting.*

4-item sleepiness scale previously validated against the Multiple Sleep Latency Test,<sup>6</sup> a 4-item snoring scale, and a 6-item behavior scale, each scored analogously to the total PSQ-SRBD scale. Substantive resolution of OSAS symptoms was defined by a total PSQ-SRBD score  $\geq 0.33$  at baseline,<sup>4</sup>  $< 0.33$  at 7-month follow-up, and at least 25% below baseline at follow-up.

### Explanatory Variables

Variables tested for ability to predict spontaneous resolution of OSAS included demographic, history, physical examination, and polysomnographic findings. History data included several symptoms from the PSQ-SRBD scale; subscales described above; and the total score. Additional variables included caregiver report of allergies, nasal allergies more specifically, frequent colds or upper respiratory infections, asthma, frequent ear infections, Attention-Deficit Disorder or Attention-Deficit/Hyperactivity Disorder, use of nasal steroids, use of montelukast, or existence of a current smoker in the household. Global quality of life was assessed by the Pediatric Quality of Life Inventory (PedsQL) caregiver version as well as the child version; scores range from 0 to 100, with higher scores indicating better quality of life.<sup>7,8</sup> Behavior was assessed by the Conners' Rating Scale Revised: Long Version ADHD and hyperactivity T scores, which range from 0 to 100 (normative mean=50, SD=10).<sup>9</sup>

Physical examinations generated BMI z-scores,<sup>2</sup> waist circumference,<sup>10</sup> waist circumference percentiles,<sup>11</sup> and classification of tonsils into 4 size grades, subsequently dichotomized as less vs. more than 50% of the oropharyngeal cross-sectional area. The tongue and palatal position were classified as Friedman class I or II vs. class III or IV,<sup>12</sup> and also as Mallampati class I or II vs. III or IV.<sup>13</sup> Neck circumference (average of 3 measures) was assessed to the nearest 0.1 cm just below the thyroid prominence. Morning, resting systolic, and diastolic blood pressures were measured three times in the seated position, and blood was taken for assessment of C-reactive protein (CRP). Polysomnographic OSAS severity was assessed by the AHI, OAI, percent of sleep time with oxygen saturation below 92%, and minimum oxygen saturation.

### Analyses

Univariate associations were tested using logistic regression models. Variables predictive ( $p < 0.05$ ) of either objective or symptom-based resolution of OSAS as the outcome were considered in two different forward stepwise logistic multiple regression models, with 2-fold cross validation, to assess for independent predictive value. The entry criterion was  $p < 0.20$  and explanatory variables were retained as long as they showed  $p < 0.10$ . The only exception to this procedure occurred in the analysis that used objective resolution of OSAS as the outcome. As AHI and OAI were not independent of each other (a child

*Online supplements are not copyedited prior to posting.*

with OAI <1 had to have an AHI > 2 to participate, and a child with an AHI < 2 had to have an OAI > 1), and AHI was the stronger predictor in univariate analysis, OAI was not entered in the multiple regression models. All calculations were performed using SAS version 9.2 (SAS Inc, Cary, IN). No adjustment was made for multiple comparisons.

## REFERENCES

1. Redline S, Amin R, Beebe DW, et al. The Childhood Adenotonsillectomy Trial (CHAT): Rationale, design and challenges of a randomized controlled trial evaluating a standard surgical procedure in a pediatric population. *Sleep*. 2011;34(11):1509-1517.
2. Marcus CL, Moore RH, Rosen CL, et al. A randomized trial of adenotonsillectomy for childhood sleep apnea. *N Engl J Med*. Jun 20 2013;368(25):2366-2376.
3. Iber C, Ancoli-Israel S, Chesson A, Quan SF, for the American Academy of Sleep M. *The AASM Manual for the Scoring of Sleep and Associated Events: Rules, Terminology and Technical Specifications*. Vol 1. Westchester, Illinois: American Academy of Sleep Medicine; 2007.
4. Chervin RD, Hedger KM, Dillon JE, Pituch KJ. Pediatric Sleep Questionnaire (PSQ): validity and reliability of scales for sleep-disordered breathing, snoring, sleepiness, and behavioral problems. *Sleep Medicine*. 2000;1:21-32.
5. Chervin RD, Weatherly RA, Garetz SL, et al. Pediatric sleep questionnaire: Prediction of sleep apnea and outcomes. *Archives of Otolaryngology-Head & Neck Surgery*. 2007;133(3):216-222.
6. Chervin RD, Weatherly RA, Ruzicka DL, et al. Subjective sleepiness and polysomnographic correlates in children scheduled for adenotonsillectomy vs. other surgical care. *Sleep*. 2006;29:495-503.
7. Varni JW, Burwinkle TM, Seid M, Skarr D. The PedsQL (TM) 4.0 as a pediatric population health measure: Feasibility, reliability, and validity. *Ambulatory Pediatrics*. 2003;3(6):329-341.
8. Crabtree VM, Varni JW, Gozal D. Health-related quality of life and depressive symptoms in children with suspected sleep-disordered breathing. *Sleep*. Sep 15 2004;27(6):1131-1138.
9. Conners CK. *Conners' Rating Scales - Revised*. North Tonawanda, NY: Multi-Health Systems Publishing; 1997.
10. Bixler EO, Vgontzas AN, Lin HM, et al. Sleep disordered breathing in children in a general population sample: prevalence and risk factors. *Sleep*. Jun 2009;32(6):731-736.
11. Li C, Ford ES, Mokdad AH, Cook S. Recent trends in waist circumference and waist-height ratio among US children and adolescents. *Pediatrics*. Nov 2006;118(5):e1390-1398.
12. Friedman M, Tanyeri H, La Rosa M, et al. Clinical predictors of obstructive sleep apnea. *Laryngoscope*. 1999;109:1901-1907.
13. Mallampati SR, Gatt SP, Gugino LD, et al. A clinical sign to predict difficult tracheal intubation: a prospective study. *Can Anaesth Soc J*. Jul 1985;32(4):429-434.

*Online supplements are not copyedited prior to posting.*

**e-Table 1. Childhood Adenotonsillectomy (CHAT) institutional review board (IRB) committee names and protocol numbers.**

| <b>Site Name</b>                                                                       | <b>IRB Committee Names</b>                                                                    | <b>IRB Protocol Numbers</b> |
|----------------------------------------------------------------------------------------|-----------------------------------------------------------------------------------------------|-----------------------------|
| University of Pennsylvania                                                             | University of Pennsylvania Institutional Review Board<br>FWA 00004028                         | 804695                      |
| Brigham & Women's Hospital                                                             | Partners Human Research Committee<br>FWA # 00000484                                           | 2010-P-001079/1             |
| University of Michigan Health System                                                   | Institutional Review Board (IRBMED)<br>FWA # 00004969                                         | HUM00006525                 |
| Children's Hospital of Philadelphia                                                    | The Committees for Protection of Human Subjects Institutional Review Boards<br>FWA # 00000459 | 2006-7-4853                 |
| Cincinnati Children's Hospital Medical Center                                          | Cincinnati Children's Hospital Medical Center Institutional Review Board<br>FWA # 00002988    | Study ID: 2008-0984         |
| University Hospitals Case Medical Center                                               | Institutional Review Board for Human Investigation<br>FWA # 00003937                          | IRB 09-06-19                |
| <u>MetroHealth</u> Medical Center                                                      | <u>Metrohealth</u> Institutional Review Board<br>FWA # 00003938                               | IRB 07-01106                |
| Saint Louis University                                                                 | St. Louis University Institutional Review Board<br>FWA # 00005304                             | 15847                       |
| Montefiore Medical Center at Albert Einstein College of Medicine of Yeshiva University | Montefiore Medical Center Institutional Review Board<br>FWA # 00002558                        | 08-12-417                   |
| Children's Hospital Boston                                                             | Committee on Clinical Investigation at Children's Hospital Boston<br>FWA # 00002071           | 09-01-0016                  |

*Online supplements are not copyedited prior to posting.*
